# Supplementary material for: Building Bridges between People with Stroke, Families, and Health Professionals: Development of a Blended Care Program for Self-Management
Source: MDPI journal article supplement (doi:10.3390/jcm13010300), 2024-01-04
Supplement: s1 [file s1]

## Supplementary material File S1

**Database: MEDLINE**

### Search strategy:

1. (((("cerebrovascular disorders"[All Fields]) OR ("basal ganglia cerebrovascular disease"[All Fields])) OR ("brain ischemia"[All Fields])) OR ("stroke"[All Fields])) OR (brain infarction)
2. (((((stroke[Text Word]) OR (poststroke[Text Word])) OR (post-stroke[Text Word])) OR (cerebrovasc\*[Text Word])) OR (brain vasc\*[Text Word])) OR (cva[Text Word]))
3. (((((((brain\*[Text Word]) OR (cerebell\*[Text Word])) OR (intracran\*[Text Word])) OR (intracerebral[Text Word])) OR (ischemi\*[Text Word])) OR (emboli\*[Text Word])) OR (thrombo\*[Text Word])) OR (embolis\*[Text Word])) OR (occlus\*[Text Word]))
4. (hemiplegia) OR (paresis)
5. (((hemipleg\*[Text Word]) OR (hemipar[Text Word])) OR (paresis[Text Word])) OR (paretic[Text Word])
6. ((brain injuries) OR ("brain injury, chronic"[MeSH Terms]))
7. gait disorder, neurologic[MeSH Terms]
8. ((((((#1) OR (#2)) OR (#3)) OR (#4)) OR (#5)) OR (#6)) OR (#7))
9. (self efficacy[MeSH Terms]) OR (self care[MeSH Terms])
10. ((self administration[MeSH Terms]) OR (self assessment[MeSH Terms])) OR (self concept[MeSH Terms])
11. (((patient compliance[MeSH Terms]) ) OR (patient education as topic[MeSH Terms])) OR (patient participation[MeSH Terms])) OR (patient satisfaction[MeSH Terms])
12. (consumer health information[MeSH Terms]) OR (consumer information[MeSH Terms])
13. (((attitude to health[MeSH Terms]) OR (health behavior[MeSH Terms])) OR (health education[MeSH Terms])) OR (health knowledge, attitudes, practice[MeSH Terms])) OR (health promotion[MeSH Terms])
14. ((life style[MeSH Terms]) OR (disease management[MeSH Terms])) OR (risk reduction behavior[MeSH Terms])
15. (((adaptation, psychological[MeSH Terms]) OR (motivation[MeSH Terms])) OR (goals[MeSH Terms])) OR (problem solving[MeSH Terms])) OR (decision making[MeSH Terms])
16. (((((((self care[Text Word]) OR (self-care[Text Word])) OR (self management[Text Word])) OR (self-management[Text Word])) OR (self efficacy[Text Word])) OR (self-efficacy[Text Word])) OR (self monitor\*[Text Word])) OR (self-monitor\*[Text Word]))
17. (((((((((((self[Text Word]) OR (oneself[Text Word])) OR (care[Text Word])) OR (educat\*[Text Word])) OR (participat\*[Text Word])) OR (behaviour[Text Word])) OR (behavior[Text Word])) OR (compliance[Text Word])) OR (centered[Text Word])) OR (goal settings[Text Word])) OR (copping[Text Word]))
18. ((((((((((#9) OR (#10)) OR (#11)) OR (#12)) OR (#13)) OR (#14)) OR (#15)) OR (#16)) OR (#17))
19. Randomized Controlled Trial
20. controlled Clinical Trials
21. control groups



---

23. Program evaluation

---

24. S19 OR S20 OR S21 OR S22 OR S23

---

25. S24 AND S18 AND S8

---

### **Database: SCOPUS**

#### **Search strategy:**

( TITLE-ABS-KEY ( stroke OR poststroke OR post-stroke OR cerebrovasc\* OR brain vasc\* OR cerebral vasc\* OR cva\* OR apoplex\* OR sah OR brain\* OR cerebr\* OR cerebell\* OR intracran\* OR intracerebral OR isch?emi\* OR infarct\* OR thrombo\* OR emboli\* OR occlus\* OR haemorrhage\* OR hemorrhage\* OR haematoma\* OR hematoma\* OR bleed\* OR hemipleg\* OR hemipar\* OR paresis OR paretic ) AND TITLE-ABS-KEY ( self AND care OR self-care OR self AND management OR self-management OR self AND efficacy OR self-efficacy OR self AND monitor\* OR selfmonitor\* OR educat\* OR participat\* OR behaviour\* OR behavior\* OR compliance OR centered OR goal\* OR decision\* OR coping ) AND TITLE-ABS-KEY ( control OR treatment OR experiment\* OR intervention AND quasi-random\* OR quasirandom\* OR pseudo-random\* OR pseudo AND random\* OR treatment OR therapy OR procedure OR manage\* ) )

### **Database: ACM Digital**

#### **Search strategy:**

[[[All: stroke] OR [All: "cerebrovascular disorders"] OR [All: poststroke]] AND [[All: self-management] OR [All: "patient education"] OR [All: "behavior?r change"] OR [All: "disease management"]]] AND [[All: "randomized controlled trials"] OR [All: "effect random\* "] OR [All: controlled trial\*" "controlled stud\*] OR [All: " rct effectiveness effectivity) AND [[All: digital] OR [All: ehealth] OR [All: mhealth] OR [All: virtual] OR [All: telehealth]]] OR [All: )]]
